# Supplementary material
Source: publisher figshare collection journal article supplement (https://geolsoc.figshare.com/ndownloader/files/25777911)
Supplement: Supplementary file 1 [file 25777911]

ABERDEEN
						RATIOS								AGES [Ma]						Conc.
Sample	Analysis	U [ppm]a	Pb [ppm]a	206Pb/204Pb		207Pb/235Ub	2 sd	206Pb/238Ub	2 sd	rhoc	207Pb/206Pbe	2 sd		207Pb/235U	2 s	206Pb/238U	2 s	207Pb/206Pb	2 s	%
ZM11	11-Jan	112	20	12310		1.907	0.057	0.183	0.0031	0.57	0.0756	0.0018		1084	32	1083	18	1084	49	100
ZM11	11-Feb	39	6	1790		1.534	0.056	0.1489	0.0027	0.5	0.0747	0.0024		944	34	895	16	1061	64	84
ZM11	11-Mar	89	12	3217		1.278	0.043	0.1369	0.0024	0.52	0.0677	0.002		836	28	827	14	860	60	96
ZM11	11-Apr	72	5	49930		0.565	0.024	0.0726	0.0013	0.43	0.0564	0.0022		455	20	452	8	469	86	96
ZM11	11-Jun	177	30	52884		1.721	0.049	0.17	0.0029	0.59	0.0734	0.0017		1016	29	1012	17	1026	47	99
ZM11	11-Jul	372	69	657691		1.946	0.054	0.186	0.0031	0.61	0.0759	0.0017		1097	30	1099	18	1093	44	101
ZM11	11-Aug	155	36	9091		2.771	0.078	0.2318	0.0039	0.6	0.0867	0.002		1348	38	1344	23	1354	44	99
ZM11	11-Sep	35	6	58627		1.78	0.064	0.1748	0.0031	0.5	0.0739	0.0023		1038	38	1038	19	1038	63	100
ZM11	11-Oct	261	20	10406		0.586	0.018	0.075	0.0013	0.56	0.0567	0.0014		468	14	466	8	480	56	97
ZM11	11-Nov	135	26	246116		2.066	0.06	0.1922	0.0033	0.58	0.078	0.0018		1138	33	1133	19	1146	47	99
ZM11	11-Dec	44	8	4202		1.882	0.064	0.1817	0.0032	0.52	0.0751	0.0022		1075	37	1076	19	1072	59	100
ZM11	Nov-13	177	23	3369		1.231	0.036	0.1289	0.0022	0.58	0.0693	0.0017		815	24	782	13	907	49	86
ZM11	Nov-14	128	42	6869		5.143	0.144	0.3302	0.0056	0.61	0.113	0.0025		1843	52	1839	31	1848	40	100
ZM11	Nov-15	331	71	1043		3.525	0.107	0.2152	0.0037	0.57	0.1188	0.0029		1533	46	1256	22	1939	44	65
ZM11	Nov-16	146	10	1166		0.522	0.039	0.0675	0.0016	0.31	0.0561	0.004		426	32	421	10	454	157	93
ZM11	Nov-17	282	49	461554		1.761	0.049	0.1728	0.0029	0.6	0.0739	0.0017		1031	29	1028	17	1040	45	99
ZM11	Nov-18	236	59	10235		3.181	0.089	0.2521	0.0043	0.6	0.0915	0.002		1452	41	1449	24	1457	42	99
ZM11	Nov-19	43	8	72753		1.834	0.063	0.1777	0.0032	0.52	0.0749	0.0022		1058	36	1054	19	1064	59	99
ZM11	Nov-20	178	30	282647		1.663	0.048	0.1678	0.0028	0.59	0.0719	0.0017		995	29	1000	17	983	48	102
ZM11	Nov-21	142	33	4809		2.738	0.078	0.23	0.0039	0.6	0.0863	0.002		1339	38	1335	23	1345	44	99
ZM11	Nov-22	74	5	49835		0.562	0.028	0.0714	0.0014	0.39	0.0571	0.0026		453	22	445	9	494	100	90
ZM11	Nov-23	620	123	127129		2.152	0.058	0.1984	0.0033	0.62	0.0787	0.0017		1166	32	1167	20	1164	42	100
ZM11	Nov-24	161	37	11018		2.747	0.082	0.2305	0.004	0.58	0.0865	0.0021		1341	40	1337	23	1348	47	99
ZM11	Nov-25	110	20	33233		1.837	0.056	0.1785	0.0031	0.57	0.0747	0.0019		1059	32	1059	18	1059	50	100
ZM11	Nov-26	109	33	2817		4.361	0.123	0.3019	0.0051	0.6	0.1048	0.0024		1705	48	1701	29	1710	41	99
ZM11	Nov-27	189	29	1979		1.658	0.06	0.153	0.0028	0.5	0.0786	0.0025		993	36	918	17	1163	63	79
ZM11	Nov-28	155	27	71937		1.739	0.051	0.1727	0.0029	0.59	0.073	0.0017		1023	30	1027	17	1015	48	101
ZM11	Nov-29	277	74	5978		3.587	0.098	0.2681	0.0045	0.61	0.0971	0.0021		1547	42	1531	26	1568	41	98
ZM11	Nov-30	252	71	3436		4.516	0.123	0.2816	0.0047	0.62	0.1163	0.0025		1734	47	1599	27	1900	39	84
ZM11	Nov-31	468	140	18277		4.306	0.116	0.3002	0.005	0.62	0.104	0.0022		1694	46	1692	28	1697	39	100
ZM11	Nov-32	317	21	1544		0.514	0.023	0.0674	0.0013	0.42	0.0553	0.0023		421	19	421	8	426	91	99
ZM11	Nov-33	184	34	7203		1.981	0.057	0.1876	0.0032	0.59	0.0766	0.0018		1109	32	1108	19	1110	46	100
ZM11	Nov-34	98	26	87271		3.362	0.097	0.2616	0.0045	0.59	0.0932	0.0022		1495	43	1498	26	1492	44	100
ZM11	Nov-35	92	17	3086		2.008	0.065	0.1884	0.0033	0.54	0.0773	0.0021		1118	36	1113	19	1129	55	99
ZM11	Nov-36	44	7	2725		1.616	0.072	0.1646	0.0032	0.43	0.0712	0.0029		976	44	982	19	963	82	102
ZM11	Nov-37	63	13	7237		2.257	0.074	0.2044	0.0036	0.54	0.0801	0.0022		1199	39	1199	21	1200	55	100
ZM11	Nov-38	352	25	5790		0.548	0.017	0.071	0.0012	0.55	0.0559	0.0014		444	14	442	8	449	57	98
ZM11	Nov-39	391	76	721195		2.093	0.058	0.195	0.0033	0.61	0.0779	0.0017		1146	32	1148	19	1143	43	100
ZM11	Nov-41	82	15	139174		1.838	0.059	0.179	0.0031	0.54	0.0745	0.002		1059	34	1062	19	1055	54	101
ZM11	Nov-42	159	30	6049		1.973	0.057	0.1864	0.0032	0.59	0.0768	0.0018		1106	32	1102	19	1115	47	99
ZM11	Nov-43	678	46	433135		0.541	0.019	0.0676	0.0012	0.5	0.0581	0.0018		439	15	422	7	533	66	79
ZM11	Nov-44	124	42	8816		5.386	0.15	0.3398	0.0058	0.61	0.115	0.0025		1883	52	1886	32	1879	40	100
ZM11	Nov-45	96	12	2289		1.307	0.045	0.1213	0.0022	0.51	0.0781	0.0023		849	29	738	13	1150	59	64
ZM11	Nov-46	85	17	157455		2.102	0.064	0.1953	0.0034	0.57	0.0781	0.002		1149	35	1150	20	1148	50	100
ZM11	Nov-48	74	13	11178		1.834	0.058	0.1725	0.003	0.55	0.0771	0.002		1058	33	1026	18	1123	53	91
ZM11	Nov-49	129	22	206533		1.696	0.051	0.1691	0.0029	0.57	0.0727	0.0018		1007	30	1007	17	1006	50	100
ZM11	Nov-50	98	15	1107		1.592	0.049	0.1485	0.0026	0.56	0.0778	0.002		967	30	892	15	1141	51	78
ZM11	Nov-51	81	16	8657		2.035	0.063	0.1913	0.0033	0.56	0.0772	0.002		1127	35	1128	20	1126	52	100
ZM11	Nov-52	113	27	255006		2.874	0.083	0.2385	0.0041	0.59	0.0874	0.002		1375	40	1379	24	1370	45	101
ZM11	Nov-53	93	15	12693		1.652	0.051	0.166	0.0029	0.56	0.0722	0.0019		990	31	990	17	992	52	100
ZM11	Nov-54	177	12	9799		0.567	0.023	0.0684	0.0013	0.45	0.0601	0.0022		456	19	426	8	608	79	70
ZM11	Nov-55	262	71	14612		3.65	0.101	0.2713	0.0046	0.61	0.0976	0.0021		1561	43	1548	26	1578	41	98
ZM11	Nov-56	129	27	46348		2.704	0.093	0.2139	0.0039	0.52	0.0917	0.0027		1330	46	1250	23	1461	56	86
ZM11	Nov-57	71	14	3529		2.235	0.07	0.1959	0.0034	0.56	0.0827	0.0021		1192	37	1153	20	1263	51	91
ZM11	Nov-58	539	150	7986		3.798	0.104	0.2787	0.0047	0.62	0.0988	0.0021		1592	43	1585	27	1602	40	99
ZM11	Nov-59	46	8	551		2.159	0.127	0.1761	0.004	0.39	0.0889	0.0048		1168	68	1046	24	1402	103	75
ZM11	Nov-60	29	8	72978		3.534	0.122	0.2682	0.0049	0.53	0.0956	0.0028		1535	53	1532	28	1539	55	100
ZM11	Nov-61	81	42	394618		13.44	0.382	0.516	0.0089	0.61	0.1889	0.0043		2711	77	2682	46	2733	37	98
ZM11	Nov-62	48	4	340		0.611	0.039	0.078	0.0017	0.34	0.0568	0.0034		484	31	484	10	483	134	100
ZM11	Nov-63	101	17	161882		1.713	0.053	0.1697	0.0029	0.56	0.0732	0.0019		1013	32	1011	18	1019	53	99
ZM11	Nov-64	24	4	38755		1.742	0.074	0.1722	0.0033	0.45	0.0734	0.0028		1024	44	1024	20	1024	77	100
ZM11	Nov-65	82	44	2421		14.127	0.396	0.534	0.0092	0.61	0.1919	0.0043		2758	77	2758	47	2758	36	100
ZM11	Nov-66	129	25	7708		2.141	0.064	0.1972	0.0034	0.58	0.0788	0.0019		1162	35	1160	20	1167	48	99
ZM11	Nov-67	130	34	6341		3.311	0.094	0.2588	0.0044	0.6	0.0928	0.0021		1484	42	1484	25	1484	43	100
ZM11	Nov-68	131	33	7826		3.237	0.096	0.2524	0.0043	0.58	0.093	0.0022		1466	43	1451	25	1488	46	98
ZM11	Nov-69	131	21	40572		1.61	0.049	0.1631	0.0028	0.56	0.0716	0.0018		974	30	974	17	974	51	100
ZM11	Nov-70	228	16	5600		0.532	0.017	0.0694	0.0012	0.54	0.0556	0.0015		433	14	432	7	437	60	99
ZM11	Nov-71	121	62	21536		13.139	0.379	0.5149	0.009	0.6	0.1851	0.0043		2690	78	2677	47	2699	38	99
ZM11	Nov-72	76	39	56082		13.843	0.386	0.5122	0.0088	0.61	0.196	0.0043		2739	76	2666	46	2793	36	95
ZM11	Nov-73	132	34	1425		3.279	0.102	0.2558	0.0045	0.56	0.093	0.0024		1476	46	1468	26	1487	48	99
ZM11	Nov-74	525	90	20322		1.741	0.048	0.1717	0.0029	0.61	0.0736	0.0016		1024	28	1021	17	1029	45	99
ZM11	Nov-75	13	3	1088		3.062	0.132	0.2459	0.0049	0.46	0.0903	0.0035		1423	61	1417	28	1432	73	99
ZM11	Nov-76	308	95	19093		4.525	0.125	0.3091	0.0052	0.61	0.1062	0.0023		1736	48	1736	29	1735	40	100
ZM11	Nov-77	321	71	8840		2.856	0.088	0.2224	0.0039	0.56	0.0932	0.0024		1370	42	1295	23	1491	48	87
ZM11	Nov-78	94	17	164235		1.97	0.06	0.1864	0.0032	0.56	0.0767	0.0019		1105	34	1102	19	1112	51	99
ZM11	Nov-79	58	13	3614		2.759	0.087	0.2317	0.0041	0.55	0.0864	0.0023		1345	43	1343	24	1346	51	100
ZM11	Nov-80	316	84	787799		3.486	0.098	0.2651	0.0045	0.6	0.0954	0.0021		1524	43	1516	26	1536	42	99
ZM11	Nov-81	400	77	13665		2.062	0.058	0.1917	0.0032	0.6	0.078	0.0017		1136	32	1130	19	1147	44	99
ZM11	Nov-82	158	27	253076		1.705	0.052	0.1702	0.0029	0.57	0.0727	0.0018		1011	31	1013	18	1004	51	101
ZM11	Nov-83	295	74	34942		3.153	0.088	0.2515	0.0043	0.61	0.0909	0.002		1446	40	1446	25	1445	42	100
ZM11	Nov-84	73	13	120006		1.805	0.058	0.1759	0.0031	0.54	0.0744	0.002		1047	34	1044	18	1053	55	99
ZM11	Nov-85	277	93	872387		5.266	0.146	0.3356	0.0057	0.61	0.1138	0.0025		1863	52	1865	32	1861	40	100
ZM11	Nov-86	191	15	3633		0.602	0.02	0.0771	0.0013	0.53	0.0566	0.0016		478	16	479	8	475	61	101
ZM11	Nov-87	191	99	94130		13.283	0.367	0.5192	0.0088	0.62	0.1856	0.004		2700	75	2696	46	2703	36	100
ZM11	Nov-88	87	24	229359		3.843	0.116	0.2811	0.0049	0.58	0.0992	0.0024		1602	48	1597	28	1608	46	99
ZM11	Nov-89	456	80	1027		2.09	0.059	0.176	0.003	0.6	0.0861	0.0019		1145	32	1045	18	1341	43	78
ZM11	Nov-90	120	21	197299		1.786	0.055	0.1745	0.003	0.56	0.0743	0.0019		1040	32	1037	18	1048	51	99
ZM11	Nov-92	204	60	563962		4.168	0.118	0.2937	0.005	0.6	0.1029	0.0023		1668	47	1660	28	1678	42	99
ZM11	Nov-93	230	40	377918		1.79	0.052	0.1752	0.003	0.59	0.0741	0.0017		1042	30	1040	18	1045	47	100
ZM11	Nov-94	234	121	25298		13.226	0.368	0.5157	0.0088	0.61	0.186	0.0041		2696	75	2681	46	2707	36	99
ZM11	Nov-95	91	7	1519		0.575	0.024	0.0743	0.0014	0.45	0.0561	0.0021		461	19	462	8	456	81	101
ZM11	Nov-96	28	6	55198		2.39	0.115	0.2088	0.0043	0.43	0.083	0.0036		1240	60	1223	25	1269	85	96
ZM11	Nov-97	36	6	56051		1.688	0.068	0.1675	0.0031	0.46	0.0731	0.0026		1004	40	998	19	1016	72	98
ZM11	Nov-98	105	16	4974		1.498	0.047	0.1556	0.0027	0.55	0.0698	0.0018		930	29	932	16	924	54	101
ZM11	Nov-99	38	8	-188638		2.325	0.084	0.2077	0.0038	0.51	0.0812	0.0025		1220	44	1217	22	1226	61	99
ZM11	11-100	364	26	8211		0.575	0.021	0.0714	0.0013	0.48	0.0584	0.0019		461	17	445	8	544	71	82
ZM11	11-101	25	10	1598		10.232	0.314	0.4038	0.0072	0.58	0.1838	0.0046		2456	75	2187	39	2687	41	81
ZM11	11-102	191	44	3105		2.769	0.082	0.2319	0.004	0.58	0.0866	0.0021		1347	40	1345	23	1351	46	100
ZM11	11-103	359	64	603761		1.851	0.053	0.1793	0.0031	0.6	0.0749	0.0017		1064	30	1063	18	1065	46	100
ZM11	11-104	146	43	398876		4.113	0.118	0.2923	0.005	0.6	0.1021	0.0023		1657	47	1653	28	1662	42	99
ZM11	11-105	232	37	11990		1.652	0.048	0.16	0.0027	0.58	0.0749	0.0018		990	29	957	16	1065	48	90
ZM11	11-106	149	26	-640958		1.775	0.055	0.1746	0.003	0.56	0.0737	0.0019		1036	32	1037	18	1034	52	100
ZM11	11-107	369	54	358450		1.429	0.041	0.1463	0.0025	0.59	0.0709	0.0016		901	26	880	15	953	47	92
ZM11	11-108	245	59	210173		3.23	0.092	0.2411	0.0041	0.6	0.0972	0.0022		1464	42	1392	24	1570	42	89
ZM11	11-109	78	41	-3363949		13.305	0.379	0.5208	0.009	0.61	0.1853	0.0042		2702	77	2702	47	2701	37	100
ZM11	11-110	172	32	8328		1.971	0.061	0.1866	0.0033	0.56	0.0766	0.002		1106	34	1103	19	1111	52	99
ZM11	11-111	237	17	163225		0.568	0.019	0.0736	0.0013	0.52	0.056	0.0016		457	15	458	8	452	63	101
ZM11	11-112	103	33	13351		4.901	0.142	0.3237	0.0056	0.59	0.1098	0.0026		1802	52	1808	31	1797	42	101
ZM11	11-113	250	43	404812		1.771	0.051	0.1731	0.003	0.59	0.0742	0.0017		1035	30	1029	18	1047	47	98
ZM11	11-114	397	103	24157		3.348	0.095	0.2601	0.0044	0.6	0.0934	0.0021		1492	42	1490	25	1495	43	100
ZM11	11-115	75	20	18255		3.423	0.103	0.2646	0.0046	0.58	0.0938	0.0023		1510	46	1513	26	1505	47	101
NEW ABERDOUR
						RATIOS								AGES [Ma]						Conc.
Sample	Analysis	U [ppm]a	Pb [ppm]a	206Pb/204Pb		207Pb/235Ub	2 sd	206Pb/238Ub	2 sd	rhoc	207Pb/206Pbe	2 sd		207Pb/235U	2 s	206Pb/238U	2 s	207Pb/206Pb	2 s	%
ZM10	10-Jan	58	14	2424		3.502	0.11	0.2333	0.0042	0.57	0.1089	0.0028		1528	48	1352	24	1781	47	76
ZM10	10-Feb	49	10	2276		2.154	0.074	0.1972	0.0036	0.53	0.0792	0.0023		1166	40	1160	21	1178	57	98
ZM10	10-Mar	707	194	3218		3.692	0.102	0.2745	0.0048	0.63	0.0975	0.0021		1570	43	1564	27	1578	40	99
ZM10	10-Apr	371	25	1744		0.519	0.024	0.068	0.0013	0.42	0.0554	0.0023		425	20	424	8	427	94	99
ZM10	10-May	359	85	4676		3.139	0.087	0.2358	0.0041	0.62	0.0966	0.0021		1442	40	1365	24	1559	41	88
ZM10	10-Jun	113	8	6993		0.542	0.022	0.0703	0.0013	0.46	0.056	0.002		440	18	438	8	450	79	97
ZM10	10-Jul	167	35	3784		2.544	0.074	0.2072	0.0036	0.6	0.089	0.0021		1285	37	1214	21	1405	44	86
ZM10	10-Aug	260	83	13284		4.82	0.135	0.319	0.0056	0.62	0.1096	0.0024		1788	50	1785	31	1793	40	100
ZM10	10-Sep	87	16	4590		1.937	0.062	0.1845	0.0033	0.56	0.0762	0.002		1094	35	1091	20	1100	53	99
ZM10	10-Oct	157	32	1124		3.732	0.173	0.2008	0.0044	0.47	0.1348	0.0055		1578	73	1180	26	2161	71	55
ZM10	10-Dec	295	72	22593		3.348	0.094	0.2454	0.0043	0.62	0.099	0.0022		1492	42	1414	25	1605	41	88
ZM10	Oct-13	128	16	3650		1.186	0.038	0.1229	0.0022	0.55	0.07	0.0019		794	26	747	13	928	55	81
ZM10	Oct-14	429	30	2628		0.569	0.017	0.0698	0.0012	0.58	0.0592	0.0015		458	14	435	8	574	54	76
ZM10	Oct-15	141	9	69849		0.514	0.021	0.067	0.0013	0.45	0.0556	0.0021		421	17	418	8	438	82	95
ZM10	Oct-16	327	104	56253		4.785	0.133	0.3171	0.0055	0.62	0.1094	0.0024		1782	50	1776	31	1790	40	99
ZM10	Oct-17	954	133	694		1.755	0.053	0.1393	0.0025	0.58	0.0914	0.0023		1029	31	841	15	1455	47	58
ZM10	Oct-18	412	128	315811		4.542	0.126	0.3099	0.0054	0.63	0.1063	0.0023		1739	48	1740	30	1737	40	100
ZM10	Oct-19	733	50	780		0.685	0.02	0.0681	0.0012	0.61	0.073	0.0017		530	15	425	7	1013	46	42
ZM10	Oct-20	354	24	178277		0.53	0.025	0.0679	0.0013	0.42	0.0565	0.0024		432	20	424	8	474	93	89
ZM10	Oct-21	105	7	54924		0.536	0.022	0.0704	0.0013	0.45	0.0552	0.002		435	18	438	8	420	81	104
ZM10	Oct-22	480	33	246674		0.53	0.016	0.0693	0.0012	0.58	0.0555	0.0014		432	13	432	8	432	55	100
ZM10	Oct-23	310	82	8776		3.462	0.097	0.2659	0.0046	0.62	0.0944	0.0021		1519	43	1520	26	1517	42	100
ZM10	Oct-24	139	33	16784		2.898	0.085	0.2391	0.0042	0.6	0.0879	0.0021		1381	40	1382	24	1381	45	100
ZM10	Oct-26	85	6	42451		0.524	0.039	0.0674	0.0016	0.32	0.0565	0.004		428	32	420	10	471	155	89
ZM10	Oct-27	377	28	417		0.826	0.036	0.0752	0.0015	0.45	0.0797	0.0031		612	26	467	9	1189	76	39
ZM10	Oct-28	222	61	453080		3.722	0.106	0.2746	0.0048	0.61	0.0983	0.0022		1576	45	1564	27	1592	42	98
ZM10	Oct-29	697	185	1372688		3.647	0.1	0.2653	0.0046	0.63	0.0997	0.0021		1560	43	1517	26	1618	40	94
ZM10	Oct-30	220	102	758615		12.181	0.337	0.4658	0.0081	0.63	0.1897	0.0041		2618	72	2465	43	2739	35	90
ZM10	Oct-31	80	24	3577		4.202	0.131	0.2965	0.0053	0.58	0.1028	0.0026		1674	52	1674	30	1675	47	100
ZM10	Oct-32	250	79	39749		4.701	0.132	0.3156	0.0055	0.62	0.108	0.0024		1767	50	1768	31	1766	40	100
ZM10	Oct-33	130	24	-2169928		1.851	0.06	0.1807	0.0032	0.55	0.0743	0.002		1064	34	1071	19	1049	54	102
ZM10	Oct-34	583	103	891		2.296	0.064	0.1757	0.003	0.62	0.0948	0.0021		1211	34	1044	18	1523	41	69
ZM10	Oct-36	42	3	24356		0.605	0.031	0.0774	0.0015	0.39	0.0567	0.0027		481	24	481	10	480	104	100
ZM10	Oct-37	180	52	5682		4.019	0.114	0.2891	0.005	0.61	0.1009	0.0023		1638	47	1637	29	1640	42	100
ZM10	Oct-38	155	35	263130		2.698	0.079	0.2291	0.004	0.6	0.0854	0.002		1328	39	1330	23	1325	45	100
ZM10	Oct-39	312	90	39924		4.005	0.115	0.2881	0.005	0.61	0.1008	0.0023		1635	47	1632	29	1639	42	100
ZM10	Oct-40	381	110	30547		4.052	0.112	0.2897	0.005	0.62	0.1015	0.0022		1645	46	1640	28	1651	40	99
ZM10	Oct-41	222	39	286026		1.76	0.052	0.1739	0.003	0.59	0.0734	0.0017		1031	30	1034	18	1024	48	101
ZM10	Oct-42	142	37	274432		3.341	0.1	0.26	0.0046	0.59	0.0932	0.0023		1491	45	1490	26	1492	46	100
ZM10	Oct-43	422	28	8750		0.506	0.016	0.0665	0.0012	0.56	0.0552	0.0014		416	13	415	7	419	57	99
ZM10	Oct-44	268	22	5236		0.673	0.022	0.084	0.0015	0.53	0.058	0.0016		522	17	520	9	531	62	98
ZM10	Oct-45	43	13	98667		4.442	0.151	0.3057	0.0057	0.55	0.1054	0.003		1720	58	1719	32	1721	52	100
ZM10	Oct-46	253	62	21908		3.235	0.101	0.2469	0.0044	0.57	0.095	0.0024		1466	46	1422	25	1529	48	93
ZM10	Oct-47	6	1	256		2.111	0.166	0.1947	0.0052	0.34	0.0787	0.0058		1153	90	1147	31	1164	146	99
ZM10	Oct-48	347	90	2266		3.802	0.107	0.2595	0.0045	0.62	0.1062	0.0023		1593	45	1487	26	1736	40	86
ZM10	Oct-49	129	31	10510		2.866	0.085	0.2377	0.0042	0.59	0.0875	0.0021		1373	41	1375	24	1371	46	100
ZM10	Oct-50	557	128	1491		3.399	0.096	0.2307	0.004	0.62	0.1069	0.0024		1504	43	1338	23	1746	41	77
ZM10	Oct-51	106	20	149137		1.998	0.064	0.1895	0.0034	0.56	0.0764	0.002		1115	36	1119	20	1107	53	101
ZM10	Oct-52	455	80	17554		1.814	0.06	0.1755	0.0032	0.55	0.075	0.0021		1051	35	1042	19	1068	55	98
ZM10	Oct-53	62	5	663		0.646	0.043	0.0817	0.0018	0.34	0.0574	0.0036		506	33	506	11	507	136	100
ZM10	Oct-54	401	70	1736		2.053	0.067	0.1752	0.0032	0.55	0.085	0.0023		1133	37	1040	19	1316	53	79
ZM10	Oct-55	183	34	249662		1.93	0.058	0.1836	0.0032	0.58	0.0762	0.0019		1092	33	1087	19	1101	49	99
ZM10	Oct-56	541	100	1425		2.384	0.067	0.1854	0.0032	0.62	0.0933	0.0021		1238	35	1097	19	1493	42	73
ZM10	Oct-58	292	93	362804		4.817	0.135	0.319	0.0055	0.62	0.1095	0.0024		1788	50	1785	31	1792	40	100
ZM10	Oct-59	180	49	361599		3.565	0.104	0.2701	0.0047	0.6	0.0957	0.0022		1542	45	1541	27	1542	44	100
ZM10	Oct-60	353	112	22197		4.696	0.131	0.3159	0.0055	0.62	0.1078	0.0024		1767	49	1770	31	1763	40	100
ZM10	Oct-61	52	4	589		0.512	0.045	0.0672	0.0017	0.29	0.0553	0.0047		420	37	419	11	423	190	99
ZM10	Oct-62	24	5	34931		2.169	0.129	0.1974	0.0045	0.38	0.0797	0.0044		1171	69	1161	26	1190	108	98
ZM10	Oct-63	204	49	6579		2.903	0.084	0.239	0.0042	0.6	0.0881	0.002		1383	40	1382	24	1384	44	100
ZM10	Oct-64	214	57	6540		3.612	0.104	0.2643	0.0046	0.61	0.0991	0.0023		1552	45	1512	26	1607	43	94
ZM10	Oct-65	217	66	23853		4.397	0.126	0.3043	0.0053	0.61	0.1048	0.0024		1712	49	1712	30	1711	42	100
ZM10	Oct-66	160	32	236543		2.154	0.065	0.1987	0.0035	0.58	0.0786	0.0019		1166	35	1168	21	1162	48	101
ZM10	Oct-67	205	55	18052		3.848	0.111	0.2667	0.0047	0.61	0.1047	0.0024		1603	46	1524	27	1708	42	89
ZM10	Oct-68	142	22	166157		1.519	0.047	0.157	0.0028	0.57	0.0702	0.0018		938	29	940	17	934	53	101
ZM10	Oct-69	366	30	1454		0.661	0.033	0.0814	0.0016	0.4	0.0589	0.0027		515	26	505	10	564	100	90
ZM10	Oct-70	329	88	22151		3.475	0.1	0.2668	0.0047	0.61	0.0945	0.0022		1522	44	1525	27	1517	43	101
ZM10	Oct-71	282	58	16981		2.312	0.067	0.2067	0.0036	0.6	0.0811	0.0019		1216	35	1211	21	1224	46	99
ZM10	Oct-72	360	25	11135		0.54	0.017	0.07	0.0012	0.56	0.0559	0.0015		438	14	436	8	450	58	97
ZM10	Oct-73	249	34	251648		1.265	0.038	0.1358	0.0024	0.58	0.0675	0.0017		830	25	821	14	854	52	96
ZM10	Oct-74	520	166	17856		4.831	0.136	0.3194	0.0055	0.62	0.1097	0.0024		1790	50	1787	31	1794	40	100
ZM10	Oct-75	276	22	1207		0.645	0.03	0.0785	0.0015	0.42	0.0596	0.0025		506	23	487	9	589	91	83
ZM10	Oct-76	435	107	794277		3.023	0.086	0.2454	0.0043	0.61	0.0893	0.002		1413	40	1415	25	1411	43	100
ZM10	Oct-77	164	12	12033		0.55	0.027	0.0712	0.0014	0.4	0.0561	0.0025		445	22	443	9	455	101	97
ZM10	Oct-78	57	14	9257		3.299	0.106	0.2485	0.0045	0.56	0.0963	0.0026		1481	48	1431	26	1553	50	92
ZM10	Oct-79	45	3	23448		0.538	0.038	0.0703	0.0016	0.32	0.0555	0.0037		437	31	438	10	431	149	102
ZM10	Oct-80	422	82	612944		2.115	0.06	0.1952	0.0034	0.61	0.0786	0.0018		1154	33	1150	20	1162	45	99
ZM10	Oct-81	76	18	4832		2.882	0.09	0.2368	0.0042	0.57	0.0883	0.0023		1377	43	1370	24	1388	50	99
ZM10	Oct-82	93	7	48689		0.535	0.025	0.0703	0.0014	0.41	0.0552	0.0024		435	21	438	8	421	97	104
ZM10	Oct-83	656	171	61412		3.378	0.095	0.2614	0.0045	0.61	0.0937	0.0021		1499	42	1497	26	1502	42	100
ZM10	Oct-86	74	24	177718		4.825	0.145	0.3209	0.0057	0.59	0.109	0.0027		1789	54	1794	32	1783	44	101
ZM10	Oct-87	320	25	346		1.003	0.037	0.079	0.0015	0.5	0.0921	0.003		705	26	490	9	1469	61	33
ZM10	Oct-88	112	8	929		0.523	0.037	0.0687	0.0016	0.32	0.0552	0.0037		427	31	428	10	422	151	102
ZM10	Oct-89	87	20	1741		2.778	0.086	0.2335	0.0041	0.57	0.0863	0.0022		1350	42	1353	24	1345	49	101
ZM10	Oct-90	478	139	63320		4.061	0.115	0.2912	0.005	0.61	0.1012	0.0023		1646	47	1647	29	1645	41	100
ZM10	Oct-91	81	15	3823		1.949	0.065	0.1848	0.0033	0.54	0.0765	0.0021		1098	37	1093	20	1108	56	99
ZM10	Oct-92	185	71	526662		6.887	0.2	0.3822	0.0067	0.6	0.1307	0.003		2097	61	2087	37	2107	41	99
ZM10	Oct-93	95	17	129369		1.946	0.065	0.1837	0.0033	0.54	0.0768	0.0022		1097	37	1087	20	1117	56	97
ZM10	Oct-94	615	157	828		4.314	0.135	0.2553	0.0046	0.57	0.1226	0.0031		1696	53	1466	26	1994	46	73
ZM10	Oct-95	26	2	15545		0.646	0.044	0.0816	0.0018	0.33	0.0574	0.0037		506	34	506	11	507	140	100
ZM10	Oct-96	309	131	28001		9.882	0.28	0.4234	0.0074	0.61	0.1693	0.0038		2424	69	2276	40	2551	37	89
ZM10	Oct-97	100	29	23562		4.058	0.123	0.2913	0.0052	0.59	0.101	0.0025		1646	50	1648	29	1643	46	100
ZM10	Oct-98	132	39	292802		4.242	0.127	0.2992	0.0053	0.59	0.1028	0.0025		1682	50	1688	30	1676	45	101
ZM10	10-100	386	94	6831		2.973	0.086	0.2421	0.0042	0.61	0.0891	0.002		1401	40	1398	24	1406	44	99
ZM10	10-101	235	30	1684		1.285	0.04	0.1256	0.0022	0.57	0.0742	0.0019		839	26	763	13	1046	52	73
ZM10	10-102	281	56	419904		2.399	0.07	0.2012	0.0035	0.6	0.0865	0.002		1242	36	1182	21	1349	46	88
ZM10	10-104	182	54	130997		4.21	0.124	0.297	0.0052	0.59	0.1028	0.0024		1676	49	1677	29	1675	44	100
ZM10	10-105	277	80	29151		4.027	0.116	0.2889	0.005	0.61	0.1011	0.0023		1640	47	1636	29	1644	43	99
ZM10	10-106	755	183	27019		2.944	0.084	0.2424	0.0042	0.61	0.0881	0.002		1393	40	1399	24	1385	44	101
ZM10	10-107	142	10	5428		0.521	0.021	0.068	0.0013	0.47	0.0556	0.0019		426	17	424	8	436	78	97
ZM10	10-108	99	23	13051		2.911	0.093	0.2374	0.0042	0.56	0.0889	0.0024		1385	44	1373	25	1403	51	98
ZM10	10-109	228	73	8343		4.915	0.142	0.3221	0.0056	0.6	0.1107	0.0026		1805	52	1800	31	1810	42	99
ZM10	10-110	83	23	2824		3.88	0.121	0.2821	0.005	0.57	0.0998	0.0025		1609	50	1602	29	1620	47	99
ZM10	10-111	808	245	14867		4.407	0.126	0.3036	0.0053	0.61	0.1053	0.0024		1714	49	1709	30	1719	42	99
ZM10	10-112	205	59	40126		4.044	0.118	0.2898	0.0051	0.6	0.1012	0.0024		1643	48	1640	29	1647	44	100
ZM10	10-113	460	32	3868		0.529	0.017	0.0689	0.0012	0.56	0.0558	0.0015		431	14	429	8	442	58	97
ZM10	10-114	132	71	95438		14.608	0.43	0.5371	0.0095	0.6	0.1973	0.0046		2790	82	2771	49	2804	38	99
ZM10	10-115	171	50	371344		4.127	0.122	0.2923	0.0051	0.59	0.1024	0.0024		1660	49	1653	29	1668	44	99
RHYNIE
						RATIOS								AGES [Ma]						Conc.
Sample	Analysis	U [ppm]a	Pb [ppm]a	206Pb/204Pb		207Pb/235Ub	2 sd	206Pb/238Ub	2 sd	rhoc	207Pb/206Pbe	2 sd		207Pb/235U	2 s	206Pb/238U	2 s	207Pb/206Pb	2 s	%
ZM12	12-Jan	273	84	101696		4.52	0.124	0.3078	0.0052	0.62	0.1065	0.0023		1735	48	1730	29	1741	40	99
ZM12	12-Feb	205	55	9299		3.568	0.099	0.2697	0.0046	0.61	0.096	0.0021		1542	43	1539	26	1547	42	99
ZM12	12-Mar	60	5	705		0.608	0.025	0.0759	0.0014	0.45	0.0581	0.0021		482	20	471	9	534	79	88
ZM12	12-Apr	407	58	553597		1.349	0.04	0.1435	0.0025	0.58	0.0682	0.0017		867	26	865	15	874	50	99
ZM12	12-May	35	3	26029		0.61	0.068	0.0776	0.0024	0.27	0.057	0.0062		483	54	482	15	490	239	98
ZM12	12-Jun	111	19	50041		1.696	0.052	0.1683	0.0029	0.57	0.0731	0.0018		1007	31	1003	17	1017	51	99
ZM12	12-Jul	148	12	109624		0.616	0.021	0.0783	0.0014	0.52	0.0571	0.0017		487	17	486	9	496	64	98
ZM12	12-Aug	86	22	28218		3.233	0.095	0.2556	0.0044	0.59	0.0917	0.0022		1465	43	1467	25	1462	45	100
ZM12	12-Sep	52	4	1464		0.6	0.032	0.0768	0.0015	0.37	0.0567	0.0028		477	25	477	9	478	108	100
ZM12	12-Nov	877	159	45295		1.905	0.052	0.1814	0.0031	0.62	0.0762	0.0016		1083	30	1075	18	1099	43	98
ZM12	12-Dec	37	3	26957		0.63	0.032	0.0779	0.0015	0.39	0.0587	0.0028		496	25	484	10	556	103	87
ZM12	Dec-13	178	46	433324		3.295	0.093	0.257	0.0044	0.6	0.093	0.0021		1480	42	1475	25	1488	43	99
ZM12	Dec-14	1112	147	2884		1.427	0.039	0.1326	0.0022	0.62	0.0781	0.0017		900	24	802	14	1149	42	70
ZM12	Dec-15	1928	334	103984		1.757	0.048	0.1733	0.0029	0.62	0.0735	0.0016		1030	28	1030	17	1029	43	100
ZM12	Dec-16	465	89	14355		2.032	0.057	0.1913	0.0032	0.61	0.077	0.0017		1126	31	1129	19	1122	44	101
ZM12	Dec-17	99	29	47416		4.013	0.115	0.2877	0.0049	0.6	0.1012	0.0023		1637	47	1630	28	1646	43	99
ZM12	Dec-18	225	17	1881		0.711	0.027	0.0776	0.0014	0.48	0.0664	0.0022		545	20	482	9	820	69	59
ZM12	Dec-19	38	10	7758		3.34	0.109	0.2591	0.0046	0.55	0.0935	0.0026		1490	49	1485	26	1498	52	99
ZM12	Dec-20	428	92	17056		2.804	0.077	0.2151	0.0036	0.62	0.0945	0.002		1357	37	1256	21	1519	41	83
ZM12	Dec-21	21	4	4880		1.687	0.082	0.1678	0.0034	0.41	0.0729	0.0032		1004	49	1000	20	1012	90	99
ZM12	Dec-22	105	17	160415		1.589	0.049	0.1611	0.0028	0.56	0.0715	0.0018		966	30	963	17	973	52	99
ZM12	Dec-23	495	99	941398		2.204	0.061	0.2009	0.0034	0.62	0.0796	0.0017		1182	32	1180	20	1187	43	99
ZM12	Dec-24	44	3	1867		0.579	0.043	0.0748	0.0017	0.31	0.0562	0.0039		464	34	465	11	458	155	101
ZM12	Dec-25	24	4	1566		1.868	0.075	0.1773	0.0033	0.47	0.0764	0.0027		1070	43	1052	20	1106	71	95
ZM12	Dec-27	356	109	101425		4.472	0.123	0.3049	0.0052	0.62	0.1064	0.0023		1726	47	1716	29	1738	40	99
ZM12	Dec-28	252	43	411207		1.759	0.05	0.1726	0.0029	0.6	0.0739	0.0017		1030	29	1026	17	1039	46	99
ZM12	Dec-29	29	5	47507		1.803	0.069	0.1752	0.0032	0.48	0.0747	0.0025		1047	40	1040	19	1060	67	98
ZM12	Dec-30	77	36	4580		10.006	0.28	0.4589	0.0079	0.61	0.1582	0.0035		2435	68	2434	42	2436	37	100
ZM12	Dec-31	35	8	2350		2.695	0.09	0.2282	0.0041	0.53	0.0857	0.0024		1327	44	1325	24	1330	55	100
ZM12	Dec-32	281	50	21023		1.822	0.052	0.1778	0.003	0.6	0.0743	0.0017		1053	30	1055	18	1050	46	100
ZM12	Dec-33	545	154	6045		3.88	0.109	0.2831	0.0048	0.61	0.0994	0.0022		1610	45	1607	27	1613	42	100
ZM12	Dec-34	354	56	6683		1.555	0.047	0.1583	0.0027	0.57	0.0713	0.0018		952	29	947	16	965	51	98
ZM12	Dec-35	115	21	195212		1.868	0.057	0.18	0.0031	0.57	0.0753	0.0019		1070	33	1067	18	1076	50	99
ZM12	Dec-36	551	105	2568		2.061	0.057	0.1907	0.0032	0.61	0.0784	0.0017		1136	32	1125	19	1157	44	97
ZM12	Dec-37	226	40	4774		2.126	0.06	0.1752	0.003	0.6	0.088	0.002		1157	33	1041	18	1382	44	75
ZM12	Dec-38	53	4	1465		0.616	0.027	0.0786	0.0015	0.43	0.0568	0.0022		487	21	488	9	485	87	101
ZM12	Dec-39	60	10	17028		1.713	0.057	0.1699	0.003	0.53	0.0731	0.0021		1014	34	1012	18	1018	58	99
ZM12	Dec-40	386	178	22861		11.691	0.322	0.4608	0.0079	0.62	0.184	0.004		2580	71	2443	42	2689	36	91
ZM12	Dec-41	98	8	953		0.757	0.029	0.0833	0.0015	0.48	0.0659	0.0022		572	22	516	9	802	70	64
ZM12	Dec-42	784	154	20167		2.113	0.058	0.197	0.0033	0.62	0.0778	0.0017		1153	32	1159	20	1142	43	102
ZM12	Dec-43	141	11	102594		0.603	0.024	0.0771	0.0014	0.46	0.0568	0.002		479	19	479	9	482	77	99
ZM12	Dec-44	358	112	43139		4.659	0.128	0.3129	0.0053	0.62	0.108	0.0023		1760	48	1755	30	1766	39	99
ZM12	Dec-45	112	31	291922		4.279	0.122	0.2768	0.0048	0.6	0.1121	0.0025		1689	48	1575	27	1834	41	86
ZM12	Dec-46	127	34	15107		3.65	0.104	0.2653	0.0046	0.6	0.0998	0.0023		1561	45	1517	26	1620	43	94
ZM12	Dec-47	320	62	12585		2.302	0.064	0.1923	0.0033	0.61	0.0868	0.0019		1213	34	1134	19	1356	43	84
ZM12	Dec-48	429	32	18997		0.58	0.017	0.0748	0.0013	0.58	0.0562	0.0013		465	14	465	8	461	53	101
ZM12	Dec-49	101	17	162342		1.721	0.055	0.1702	0.003	0.55	0.0733	0.0019		1016	32	1013	18	1023	54	99
ZM12	Dec-50	942	142	3266		1.588	0.043	0.1511	0.0026	0.62	0.0762	0.0016		965	26	907	15	1101	43	82
ZM12	Dec-51	46	9	4880		2.049	0.071	0.1919	0.0034	0.52	0.0774	0.0023		1132	39	1132	20	1132	59	100
ZM12	Dec-52	56	16	148522		3.826	0.12	0.2819	0.005	0.56	0.0985	0.0025		1598	50	1601	28	1595	48	100
ZM12	Dec-53	269	77	11273		4.007	0.111	0.2884	0.0049	0.61	0.1008	0.0022		1636	45	1633	28	1638	41	100
ZM12	Dec-54	152	26	65798		1.702	0.05	0.169	0.0029	0.58	0.0731	0.0018		1009	30	1007	17	1015	49	99
ZM12	Dec-55	574	138	1299347		2.892	0.08	0.2394	0.0041	0.62	0.0876	0.0019		1380	38	1384	23	1374	42	101
ZM12	Dec-56	192	49	461911		3.214	0.09	0.2543	0.0043	0.61	0.0917	0.002		1461	41	1461	25	1461	42	100
ZM12	Dec-57	222	69	20192		4.562	0.127	0.3097	0.0053	0.61	0.1068	0.0023		1742	48	1739	30	1746	40	100
ZM12	Dec-58	122	29	272776		2.863	0.083	0.237	0.0041	0.59	0.0876	0.002		1372	40	1371	24	1374	45	100
ZM12	Dec-59	145	25	3118		1.753	0.06	0.1725	0.0031	0.52	0.0737	0.0021		1028	35	1026	18	1034	59	99
ZM12	Dec-60	58	4	40792		0.575	0.025	0.0739	0.0014	0.43	0.0565	0.0022		461	20	459	8	470	85	98
ZM12	Dec-61	89	7	1513		0.596	0.022	0.0759	0.0014	0.48	0.0569	0.0019		475	18	472	8	488	72	97
ZM12	Dec-62	154	21	14956		1.235	0.04	0.1348	0.0024	0.54	0.0664	0.0018		817	26	815	14	820	57	99
ZM12	Dec-63	173	49	461301		3.854	0.11	0.2828	0.0049	0.6	0.0989	0.0023		1604	46	1605	28	1603	43	100
ZM12	Dec-64	229	48	451708		2.348	0.068	0.2094	0.0036	0.6	0.0813	0.0019		1227	35	1226	21	1229	45	100
ZM12	Dec-65	280	50	38384		1.828	0.052	0.1777	0.003	0.6	0.0746	0.0017		1056	30	1054	18	1058	46	100
ZM12	Dec-66	56	10	1725		1.914	0.075	0.1794	0.0034	0.48	0.0774	0.0027		1086	43	1064	20	1131	69	94
ZM12	Dec-67	267	77	45830		4.034	0.112	0.2895	0.0049	0.61	0.1011	0.0022		1641	46	1639	28	1643	41	100
ZM12	Dec-68	250	44	419339		1.834	0.053	0.1779	0.0031	0.59	0.0748	0.0017		1058	31	1055	18	1062	47	99
ZM12	Dec-69	58	5	7841		0.599	0.043	0.0771	0.0018	0.32	0.0564	0.0038		477	34	479	11	468	149	102
ZM12	Dec-70	777	148	12258		2.027	0.057	0.1905	0.0033	0.61	0.0771	0.0017		1124	32	1124	19	1125	44	100
ZM12	Dec-71	246	70	8453		3.919	0.11	0.2832	0.0048	0.61	0.1004	0.0022		1618	45	1607	27	1631	41	99
ZM12	Dec-72	84	22	204243		3.328	0.099	0.259	0.0045	0.58	0.0932	0.0023		1488	44	1484	26	1492	46	99
ZM12	Dec-73	340	95	65010		3.972	0.111	0.278	0.0047	0.61	0.1036	0.0023		1628	45	1581	27	1690	41	94
ZM12	Dec-74	84	7	62464		0.617	0.033	0.0787	0.0016	0.37	0.0569	0.0029		488	26	489	10	486	111	101
ZM12	Dec-75	132	9	2787		0.547	0.025	0.0697	0.0013	0.42	0.0569	0.0023		443	20	435	8	488	91	89
ZM12	Dec-76	81	16	155584		2.242	0.072	0.2029	0.0036	0.55	0.0802	0.0021		1194	38	1191	21	1201	53	99
ZM12	Dec-77	311	23	5145		0.582	0.023	0.075	0.0014	0.46	0.0563	0.002		466	18	466	8	463	78	101
ZM12	Dec-78	382	72	26240		2.018	0.057	0.1887	0.0032	0.61	0.0776	0.0017		1121	32	1114	19	1136	45	98
ZM12	Dec-79	198	38	15657		2.02	0.058	0.1896	0.0033	0.59	0.0773	0.0018		1122	32	1119	19	1128	46	99
ZM12	Dec-81	774	203	23630		3.804	0.105	0.262	0.0045	0.62	0.1053	0.0023		1594	44	1500	26	1720	40	87
ZM12	Dec-82	137	9	974		0.515	0.032	0.0674	0.0014	0.34	0.0554	0.0032		422	26	420	9	430	129	98
ZM12	Dec-83	272	69	14596		3.25	0.092	0.2541	0.0043	0.61	0.0928	0.0021		1469	41	1460	25	1483	42	98
ZM12	Dec-84	174	63	82851		6.117	0.172	0.3623	0.0062	0.61	0.1225	0.0027		1993	56	1993	34	1992	39	100
ZM12	Dec-85	189	14	5966		0.568	0.019	0.0737	0.0013	0.52	0.0559	0.0016		457	16	458	8	450	65	102
ZM12	Dec-86	240	116	1091273		12.952	0.359	0.4831	0.0082	0.62	0.1944	0.0042		2676	74	2541	43	2780	36	91
ZM12	Dec-87	284	65	22885		2.735	0.078	0.2302	0.0039	0.6	0.0862	0.002		1338	38	1335	23	1342	44	99
ZM12	Dec-89	345	99	261152		3.989	0.112	0.2875	0.0049	0.61	0.1006	0.0022		1632	46	1629	28	1635	41	100
ZM12	Dec-90	199	58	541735		3.979	0.114	0.2887	0.005	0.6	0.1	0.0023		1630	47	1635	28	1623	43	101
ZM12	Dec-91	152	11	2676		0.555	0.031	0.0718	0.0015	0.36	0.0561	0.003		448	25	447	9	456	117	98
ZM12	Dec-92	16	2	6398		1.711	0.081	0.1559	0.0031	0.42	0.0796	0.0034		1013	48	934	19	1188	84	79
ZM12	Dec-93	348	86	22621		3.104	0.087	0.2472	0.0042	0.61	0.0911	0.002		1434	40	1424	24	1448	43	98
ZM12	Dec-94	336	96	40537		3.949	0.111	0.2862	0.0049	0.61	0.1001	0.0022		1624	46	1623	28	1626	41	100
ZM12	Dec-95	31	16	153779		13.535	0.474	0.5216	0.0102	0.56	0.1882	0.0055		2718	95	2706	53	2727	48	99
ZM12	Dec-96	423	30	7130		0.542	0.017	0.0705	0.0012	0.54	0.0558	0.0015		440	14	439	8	443	60	99
ZM12	Dec-97	81	20	7967		3.313	0.099	0.2506	0.0044	0.58	0.0959	0.0023		1484	44	1441	25	1546	46	93
ZM12	Dec-98	411	32	299382		0.607	0.018	0.0774	0.0013	0.57	0.0569	0.0014		482	15	480	8	489	55	98
ZM12	Dec-99	72	5	49927		0.573	0.023	0.0741	0.0014	0.45	0.0561	0.002		460	19	461	8	456	80	101
ZM12	12-100	78	5	50282		0.524	0.022	0.0687	0.0013	0.44	0.0554	0.0021		428	18	428	8	427	83	100
ZM12	12-101	38	6	476		1.996	0.071	0.1447	0.0027	0.52	0.1001	0.003		1114	40	871	16	1625	57	54
ZM12	12-102	610	115	15441		1.985	0.056	0.1879	0.0032	0.61	0.0766	0.0017		1111	31	1110	19	1111	45	100
ZM12	12-103	200	56	25088		3.793	0.108	0.2803	0.0048	0.6	0.0982	0.0022		1591	45	1593	27	1589	43	100
ZM12	12-104	118	32	17431		3.837	0.113	0.2719	0.0047	0.59	0.1023	0.0024		1601	47	1551	27	1667	44	93
ZM12	12-105	441	74	5324		1.679	0.049	0.1677	0.0029	0.59	0.0726	0.0017		1001	29	1000	17	1003	48	100
ZM12	12-106	20	6	54164		4.018	0.154	0.2885	0.0055	0.5	0.101	0.0034		1638	63	1634	31	1643	62	99
ZM12	12-107	153	49	30562		4.72	0.135	0.317	0.0055	0.6	0.108	0.0025		1771	51	1775	31	1766	42	101
ZM12	12-108	127	9	8735		0.582	0.034	0.0748	0.0016	0.35	0.0565	0.0031		466	28	465	10	472	122	98
ZM12	12-109	87	7	61294		0.581	0.027	0.075	0.0014	0.41	0.0562	0.0023		465	21	466	9	462	92	101
ZM12	12-110	93	8	1297		0.642	0.029	0.0812	0.0015	0.42	0.0574	0.0023		504	22	503	10	506	89	99
ZM12	12-111	200	79	3902		10.019	0.282	0.3939	0.0068	0.61	0.1845	0.0041		2437	69	2141	37	2694	37	79
ZM12	12-112	279	69	6855		3.638	0.103	0.2466	0.0042	0.61	0.107	0.0024		1558	44	1421	24	1748	41	81
ZM12	12-114	113	8	3159		0.579	0.025	0.0745	0.0014	0.43	0.0564	0.0022		464	20	463	9	466	86	99
ZM12	12-115	266	82	4870		4.737	0.14	0.3099	0.0054	0.59	0.1109	0.0026		1774	52	1740	30	1814	43	96
TOMINTOUL
						RATIOS								AGES [Ma]						Conc.
Sample	Analysis	U [ppm]a	Pb [ppm]a	206Pb/204Pb		207Pb/235Ub	2 sd	206Pb/238Ub	2 sd	rhoc	207Pb/206Pbe	2 sd		207Pb/235U	2 s	206Pb/238U	2 s	207Pb/206Pb	2 s	%
ZM09	09-Jan	443	118	18594		3.677	0.102	0.2668	0.0048	0.65	0.1	0.0021		1566	43	1524	28	1624	39	94
ZM09	09-Feb	36	6	46960		1.593	0.062	0.1621	0.0032	0.5	0.0713	0.0024		968	37	968	19	966	68	100
ZM09	09-Mar	134	40	21496		4.308	0.128	0.3019	0.0056	0.62	0.1035	0.0024		1695	51	1701	31	1688	43	101
ZM09	09-Apr	83	15	117120		1.805	0.059	0.1755	0.0033	0.58	0.0746	0.002		1047	34	1042	19	1058	53	99
ZM09	09-May	256	78	3985		4.431	0.124	0.305	0.0055	0.65	0.1054	0.0022		1718	48	1716	31	1721	39	100
ZM09	09-Jun	283	81	82629		3.998	0.111	0.287	0.0052	0.65	0.101	0.0021		1634	46	1627	29	1643	39	99
ZM09	09-Jul	297	79	8289		3.494	0.099	0.2651	0.0048	0.64	0.0956	0.0021		1526	43	1516	28	1540	41	98
ZM09	09-Aug	117	31	23888		3.43	0.102	0.2643	0.0049	0.62	0.0941	0.0022		1511	45	1512	28	1511	44	100
ZM09	09-Sep	161	30	14134		1.918	0.057	0.183	0.0034	0.62	0.076	0.0018		1088	32	1083	20	1096	47	99
ZM09	09-Oct	238	52	419468		2.511	0.073	0.2179	0.004	0.63	0.0836	0.0019		1275	37	1271	23	1283	44	99
ZM09	09-Nov	594	109	8939		1.943	0.054	0.1834	0.0033	0.65	0.0768	0.0016		1096	31	1085	20	1117	43	97
ZM09	09-Dec	181	48	5427		3.486	0.1	0.2668	0.0049	0.63	0.0948	0.0021		1524	44	1525	28	1523	42	100
ZM09	Sep-13	284	74	12382		3.379	0.095	0.2624	0.0047	0.64	0.0934	0.002		1500	42	1502	27	1496	41	100
ZM09	Sep-14	113	26	27752		2.898	0.086	0.2262	0.0041	0.62	0.0929	0.0022		1381	41	1314	24	1487	44	88
ZM09	Sep-15	612	109	6258		1.865	0.053	0.1787	0.0032	0.64	0.0757	0.0016		1069	30	1060	19	1087	43	98
ZM09	Sep-16	225	40	319956		1.795	0.052	0.1755	0.0032	0.63	0.0742	0.0017		1044	30	1043	19	1046	46	100
ZM09	Sep-17	265	84	681054		4.744	0.132	0.3175	0.0057	0.65	0.1084	0.0023		1775	49	1778	32	1772	39	100
ZM09	Sep-18	107	21	2959		2.056	0.066	0.1931	0.0036	0.58	0.0772	0.002		1134	36	1138	21	1127	52	101
ZM09	Sep-19	237	53	428348		2.556	0.074	0.2231	0.004	0.63	0.0831	0.0019		1288	37	1298	24	1272	44	102
ZM09	Sep-20	46	7	59897		1.671	0.061	0.1624	0.0031	0.53	0.0747	0.0023		998	36	970	19	1059	62	92
ZM09	Sep-21	2357	404	28704		1.726	0.047	0.1716	0.0031	0.65	0.073	0.0015		1018	28	1021	18	1013	42	101
ZM09	Sep-22	681	168	52867		3.051	0.085	0.2466	0.0044	0.65	0.0897	0.0019		1420	39	1421	26	1420	40	100
ZM09	Sep-23	185	32	7525		1.73	0.051	0.1716	0.0031	0.62	0.0731	0.0017		1020	30	1021	19	1017	47	100
ZM09	Sep-24	118	25	201904		2.365	0.071	0.2111	0.0039	0.61	0.0813	0.0019		1232	37	1235	23	1227	46	101
ZM09	Sep-25	283	91	33406		4.822	0.134	0.3222	0.0058	0.65	0.1085	0.0023		1789	50	1801	32	1775	39	101
ZM09	Sep-26	78	20	6346		3.305	0.101	0.259	0.0048	0.6	0.0926	0.0023		1482	45	1485	27	1479	46	100
ZM09	Sep-27	3	1	4318		2.302	0.258	0.1878	0.0067	0.32	0.0889	0.0094		1213	136	1110	39	1402	203	79
ZM09	Sep-28	368	106	860885		4.035	0.113	0.2879	0.0052	0.64	0.1016	0.0022		1641	46	1631	29	1654	40	99
ZM09	Sep-29	650	134	4428		2.307	0.064	0.206	0.0037	0.64	0.0812	0.0017		1214	34	1208	22	1227	42	98
ZM09	Sep-30	910	159	113397		1.764	0.049	0.1744	0.0031	0.64	0.0734	0.0016		1032	29	1036	19	1024	43	101
ZM09	Sep-31	276	58	46217		2.463	0.07	0.211	0.0038	0.63	0.0847	0.0019		1261	36	1234	22	1308	43	94
ZM09	Sep-32	80	15	123230		2.014	0.065	0.1889	0.0035	0.58	0.0773	0.002		1120	36	1115	21	1130	52	99
ZM09	Sep-33	300	73	16545		2.932	0.084	0.2417	0.0044	0.63	0.088	0.0019		1390	40	1396	25	1382	42	101
ZM09	Sep-34	1375	364	1746		3.51	0.097	0.2649	0.0047	0.65	0.0961	0.002		1529	42	1515	27	1550	39	98
ZM09	Sep-35	270	68	22653		3.132	0.089	0.2513	0.0045	0.63	0.0904	0.002		1441	41	1445	26	1434	42	101
ZM09	Sep-36	1398	252	12371		1.859	0.051	0.1805	0.0032	0.64	0.0747	0.0016		1067	30	1069	19	1061	43	101
ZM09	Sep-37	235	69	10724		4.14	0.116	0.2929	0.0053	0.64	0.1025	0.0022		1662	47	1656	30	1670	40	99
ZM09	Sep-38	195	54	440759		3.775	0.112	0.2778	0.0051	0.62	0.0986	0.0023		1588	47	1580	29	1597	44	99
ZM09	Sep-39	43	8	6053		1.999	0.07	0.1874	0.0035	0.54	0.0774	0.0023		1115	39	1107	21	1131	59	98
ZM09	Sep-40	305	80	651624		3.371	0.095	0.2619	0.0047	0.64	0.0933	0.002		1498	42	1500	27	1495	41	100
ZM09	Sep-41	391	102	11571		3.37	0.094	0.2615	0.0047	0.64	0.0935	0.002		1498	42	1498	27	1497	40	100
ZM09	Sep-42	163	37	3885		3.043	0.088	0.2293	0.0041	0.63	0.0963	0.0022		1418	41	1331	24	1553	42	86
ZM09	Sep-43	110	19	2765		1.861	0.061	0.1754	0.0033	0.56	0.077	0.0021		1067	35	1042	19	1121	54	93
ZM09	Sep-44	33	8	1479		2.995	0.107	0.2449	0.0047	0.53	0.0887	0.0027		1406	50	1412	27	1397	58	101
ZM09	Sep-45	444	117	6575		3.42	0.097	0.2631	0.0047	0.63	0.0943	0.0021		1509	43	1506	27	1514	42	99
ZM09	Sep-46	42	9	938		2.262	0.078	0.2045	0.0038	0.54	0.0802	0.0023		1200	42	1199	23	1203	57	100
ZM09	Sep-47	121	31	252269		3.379	0.099	0.2523	0.0046	0.62	0.0972	0.0022		1500	44	1450	26	1570	43	92
ZM09	Sep-48	754	140	17625		1.954	0.055	0.1859	0.0033	0.64	0.0762	0.0016		1100	31	1099	20	1101	43	100
ZM09	Sep-49	93	18	103		2.091	0.065	0.1942	0.0035	0.59	0.0781	0.002		1146	36	1144	21	1149	50	100
ZM09	Sep-50	167	32	258413		2.005	0.063	0.1891	0.0035	0.58	0.0769	0.002		1117	35	1116	20	1119	51	100
ZM09	Sep-51	225	39	316681		1.753	0.051	0.1717	0.0031	0.62	0.074	0.0017		1028	30	1021	18	1043	46	98
ZM09	Sep-52	431	108	48545		3.15	0.088	0.2507	0.0045	0.64	0.0911	0.002		1445	40	1442	26	1450	41	99
ZM09	Sep-53	197	48	2578		3.081	0.088	0.2425	0.0044	0.63	0.0921	0.0021		1428	41	1400	25	1470	42	95
ZM09	Sep-54	644	192	21030		4.253	0.119	0.299	0.0053	0.64	0.1032	0.0022		1684	47	1686	30	1682	40	100
ZM09	Sep-55	16	3	802		2.676	0.12	0.2147	0.0045	0.46	0.0904	0.0036		1322	59	1254	26	1434	76	87
ZM09	Sep-56	366	67	10315		1.883	0.054	0.1818	0.0033	0.63	0.0751	0.0017		1075	31	1077	19	1071	45	101
ZM09	Sep-57	76	20	166518		3.421	0.105	0.2656	0.0048	0.6	0.0934	0.0023		1509	46	1518	28	1497	47	101
ZM09	Sep-58	47	10	2784		2.434	0.082	0.2116	0.0039	0.55	0.0834	0.0023		1253	42	1237	23	1279	55	97
ZM09	Sep-59	117	28	4776		2.908	0.09	0.2398	0.0044	0.59	0.088	0.0022		1384	43	1386	25	1381	48	100
ZM09	Sep-60	255	66	18459		3.335	0.095	0.2602	0.0047	0.63	0.093	0.0021		1489	42	1491	27	1487	42	100
ZM09	Sep-61	225	59	4472		3.376	0.097	0.2619	0.0047	0.62	0.0935	0.0021		1499	43	1499	27	1498	42	100
ZM09	Sep-62	108	28	2636		3.373	0.103	0.2613	0.0048	0.6	0.0936	0.0023		1498	46	1496	27	1500	46	100
ZM09	Sep-63	235	66	1589		3.839	0.111	0.2804	0.005	0.62	0.0993	0.0022		1601	46	1593	29	1611	42	99
ZM09	Sep-64	286	69	5443		2.917	0.083	0.2403	0.0043	0.62	0.0881	0.002		1386	40	1388	25	1384	43	100
ZM09	Sep-65	71	13	4566		1.807	0.06	0.1774	0.0033	0.56	0.0738	0.002		1048	35	1053	19	1037	55	102
ZM09	Sep-66	946	168	4314		1.886	0.053	0.1771	0.0031	0.63	0.0773	0.0017		1076	30	1051	19	1128	43	93
ZM09	Sep-67	154	29	235027		1.932	0.058	0.1849	0.0033	0.6	0.0758	0.0018		1092	33	1094	20	1089	48	100
ZM09	Sep-68	47	8	5430		1.686	0.102	0.1678	0.0038	0.38	0.0729	0.0041		1003	60	1000	23	1011	113	99
ZM09	Sep-69	48	9	275		1.987	0.07	0.1873	0.0035	0.53	0.077	0.0023		1111	39	1107	21	1120	60	99
ZM09	Sep-70	100	21	8779		2.362	0.073	0.2081	0.0038	0.59	0.0823	0.0021		1231	38	1219	22	1253	49	97
ZM09	Sep-71	50	8	68930		1.649	0.072	0.1665	0.0033	0.46	0.0718	0.0028		989	43	993	20	981	79	101
ZM09	Sep-72	181	50	6729		3.761	0.112	0.2786	0.005	0.61	0.0979	0.0023		1584	47	1584	29	1585	44	100
ZM09	Sep-73	955	315	16147		5.102	0.142	0.3296	0.0058	0.63	0.1123	0.0024		1836	51	1836	32	1837	39	100
ZM09	Sep-74	134	24	6774		1.825	0.056	0.1782	0.0032	0.59	0.0743	0.0018		1054	32	1057	19	1049	50	101
ZM09	Sep-75	68	12	3703		1.863	0.061	0.1799	0.0033	0.56	0.0751	0.0021		1068	35	1066	20	1071	55	100
ZM09	Sep-76	257	67	550004		3.312	0.095	0.2588	0.0046	0.62	0.0928	0.0021		1484	42	1484	26	1484	42	100
ZM09	Sep-77	181	39	7723		2.502	0.074	0.2184	0.0039	0.61	0.0831	0.0019		1273	37	1273	23	1271	46	100
ZM09	Sep-78	322	63	9666		2.116	0.061	0.1967	0.0035	0.62	0.078	0.0018		1154	33	1157	20	1148	45	101
ZM09	Sep-79	32	6	11418		2.23	0.084	0.2017	0.0038	0.5	0.0802	0.0026		1191	45	1185	23	1201	64	99
ZM09	Sep-80	429	77	638836		1.852	0.053	0.1799	0.0032	0.62	0.0747	0.0017		1064	30	1066	19	1059	45	101
ZM09	Sep-81	346	101	74521		4.119	0.117	0.2937	0.0052	0.62	0.1017	0.0023		1658	47	1660	29	1656	41	100
ZM09	Sep-82	94	25	8975		3.499	0.105	0.2678	0.0048	0.6	0.0948	0.0023		1527	46	1529	27	1524	45	100
ZM09	Sep-83	677	181	4760		3.529	0.099	0.2679	0.0047	0.63	0.0955	0.0021		1534	43	1530	27	1538	41	99
ZM09	Sep-84	301	59	7397		2.342	0.078	0.1948	0.0036	0.55	0.0872	0.0024		1225	41	1147	21	1365	53	84
ZM09	Sep-85	104	21	170508		2.124	0.066	0.197	0.0035	0.58	0.0782	0.002		1157	36	1159	21	1152	50	101
ZM09	Sep-86	43	8	6337		1.911	0.07	0.1843	0.0035	0.51	0.0752	0.0024		1085	40	1091	20	1074	63	102
ZM09	Sep-87	305	57	470652		1.944	0.056	0.1861	0.0033	0.61	0.0757	0.0017		1096	32	1100	20	1088	46	101
ZM09	Sep-88	176	30	252174		1.766	0.053	0.1726	0.0031	0.59	0.0742	0.0018		1033	31	1026	18	1048	49	98
ZM09	Sep-89	503	155	1289020		4.497	0.127	0.3086	0.0054	0.62	0.1057	0.0023		1730	49	1734	31	1726	41	100
ZM09	Sep-90	95	16	135797		1.743	0.056	0.1715	0.0031	0.56	0.0737	0.002		1025	33	1020	18	1033	54	99
ZM09	Sep-91	82	16	15258		2.057	0.072	0.1932	0.0036	0.53	0.0772	0.0023		1135	40	1139	21	1127	59	101
ZM09	Sep-92	300	79	8000		3.424	0.1	0.264	0.0047	0.61	0.0941	0.0022		1510	44	1510	27	1510	44	100
ZM09	Sep-93	76	15	123949		2.258	0.072	0.196	0.0036	0.57	0.0835	0.0022		1199	38	1154	21	1282	51	90
ZM09	Sep-94	188	34	280508		1.848	0.055	0.1791	0.0032	0.59	0.0748	0.0018		1063	32	1062	19	1064	48	100
ZM09	Sep-95	112	22	6961		2.053	0.064	0.1918	0.0034	0.58	0.0777	0.002		1133	35	1131	20	1138	50	99
ZM09	Sep-96	140	27	223382		2.058	0.063	0.1923	0.0034	0.59	0.0776	0.0019		1135	35	1134	20	1137	49	100
ZM09	Sep-97	167	32	10686		2.009	0.061	0.1889	0.0034	0.59	0.0771	0.0019		1118	34	1115	20	1125	49	99
ZM09	Sep-98	367	101	31643		3.757	0.114	0.2749	0.0049	0.59	0.0991	0.0024		1584	48	1566	28	1608	46	97
ZM09	Sep-99	171	50	416146		4.104	0.121	0.2927	0.0052	0.6	0.1017	0.0024		1655	49	1655	29	1656	43	100
ZM09	09-100	193	46	44982		2.892	0.085	0.2391	0.0042	0.6	0.0877	0.0021		1380	41	1382	25	1376	45	100
ZM09	09-101	74	13	9230		1.873	0.062	0.1804	0.0033	0.55	0.0753	0.0021		1072	35	1069	19	1077	55	99
ZM09	09-102	41	10	81702		2.908	0.099	0.2399	0.0044	0.54	0.0879	0.0025		1384	47	1386	26	1381	55	100
ZM09	09-103	334	58	487846		1.792	0.052	0.1751	0.0031	0.6	0.0742	0.0017		1043	30	1040	18	1047	47	99
ZM09	09-104	84	16	1398		2.163	0.069	0.1879	0.0034	0.57	0.0835	0.0022		1169	37	1110	20	1280	51	87
ZM09	09-105	83	27	5794		4.913	0.15	0.3246	0.0058	0.59	0.1098	0.0027		1804	55	1812	32	1796	45	101
ZM09	09-106	119	27	10352		2.711	0.082	0.2293	0.0041	0.59	0.0858	0.0021		1332	40	1331	24	1333	47	100
ZM09	09-107	151	34	7925		2.699	0.08	0.2276	0.004	0.6	0.086	0.0021		1328	40	1322	23	1338	46	99
ZM09	09-108	644	90	2202		1.539	0.046	0.1403	0.0025	0.59	0.0795	0.0019		946	28	846	15	1186	47	71
ZM09	09-109	215	61	512018		3.955	0.115	0.2855	0.005	0.61	0.1005	0.0023		1625	47	1619	29	1633	43	99
ZM09	09-110	132	44	368685		5.257	0.154	0.3343	0.0059	0.6	0.1141	0.0027		1862	55	1859	33	1865	42	100
ZM09	09-111	147	27	226033		1.898	0.06	0.1834	0.0033	0.57	0.0751	0.0019		1080	34	1085	19	1071	52	101
ZM09	09-112	863	156	11877		1.884	0.054	0.1813	0.0032	0.61	0.0754	0.0017		1076	31	1074	19	1078	46	100
ZM09	09-113	150	28	232557		1.924	0.059	0.1848	0.0033	0.58	0.0755	0.0019		1089	33	1093	19	1083	50	101
ZM09	09-114	768	124	1734		1.786	0.051	0.1609	0.0028	0.61	0.0805	0.0018		1041	30	962	17	1210	45	80
ZM09	09-115	969	154	2894		1.722	0.049	0.159	0.0028	0.61	0.0785	0.0018		1017	29	951	17	1161	45	82
aU and Pb concentrations are calculated relative to GJ-1 reference zircon
bCorrected for background and within-run Pb/U fractionation and normalised to reference zircon GJ-1 (ID-TIMS values/measured value); 207Pb/235U calculated using (207Pb/206Pb)/(238U/206Pb * 1/137.88)
cRho is the error correlation defined as the quotient of the propagated errors of the 206Pb/238U and the 207/235U ratio
dQuadratic addition of within-run errors (2 SD) and daily reproducibility of GJ-1 (2 SD)
eCorrected for mass-bias by normalising to GJ-1 reference zircon (~0.6 per atomic mass unit) and common Pb using the model Pb composition of Stacey & Kramers (1975)
